# Supplementary material
Source: PubMed Central journal article supplement (PMC4001196)
Supplement: supp_WNL.0000000000000335_Table_e-1.pdf [file supp_WNL.0000000000000335_Table_e-1.pdf]

**Table e-1. Genotype frequencies.**

| Chr | Nearest Gene  | SNP        | Minor Allele | Major Allele | Group   | Genotype Counts<br>(22/12/11) | Genotype Frequencies |              |       | Expected Hets <sup>a</sup> |
|-----|---------------|------------|--------------|--------------|---------|-------------------------------|----------------------|--------------|-------|----------------------------|
|     |               |            |              |              |         |                               | 22                   | 12           | 11    |                            |
| 19  | <i>ABCA7</i>  | rs3764650  | C            | A            | Cases   | <b>4/14/114</b>               | 3.0%                 | <b>10.6%</b> | 86.4% | <b>15.3%</b>               |
|     |               |            |              |              | Control | 20/346/2120                   | 0.8%                 | 13.9%        | 85.3% | 14.3%                      |
| 19  | <i>APOE</i>   | rs429358   | C            | T            | Cases   | 20/59/56                      | 14.8%                | 43.7%        | 41.5% | 46.4%                      |
|     |               |            |              |              | Control | 34/554/1938                   | 1.3%                 | 21.9%        | 76.7% | 21.6%                      |
| 19  | <i>APOE</i>   | rs7412     | T            | C            | Cases   | 0/8/126                       | 0.0%                 | 6.0%         | 94.0% | 5.8%                       |
|     |               |            |              |              | Control | 17/372/2135                   | 0.7%                 | 14.7%        | 84.6% | 14.8%                      |
| 2   | <i>BINI</i>   | rs744373   | G            | A            | Cases   | 19/58/58                      | 14.1%                | 43.0%        | 43.0% | 45.8%                      |
|     |               |            |              |              | Control | 175/958/1264                  | 7.3%                 | 40.0%        | 52.7% | 39.7%                      |
| 6   | <i>CD2AP</i>  | rs9349407  | C            | G            | Cases   | 10/47/77                      | 7.5%                 | 35.1%        | 57.5% | 37.5%                      |
|     |               |            |              |              | Control | 169/956/1296                  | 7.0%                 | 39.5%        | 53.5% | 39.2%                      |
| 19  | <i>CD33</i>   | rs3865444  | A            | C            | Cases   | 15/51/69                      | 11.1%                | 37.8%        | 51.1% | 42.0%                      |
|     |               |            |              |              | Control | 254/1046/1140                 | 10.4%                | 42.9%        | 46.7% | 43.4%                      |
| 8   | <i>CLU</i>    | rs11136000 | A            | G            | Cases   | 12/67/55                      | 9.0%                 | 50.0%        | 41.0% | 44.9%                      |
|     |               |            |              |              | Control | 416/1165/843                  | 17.2%                | 48.1%        | 34.8% | 48.5%                      |
| 1   | <i>CRI</i>    | rs3818361  | A            | G            | Cases   | 6/49/79                       | 4.5%                 | 36.6%        | 59.0% | 35.2%                      |
|     |               |            |              |              | Control | 99/746/1589                   | 4.1%                 | 30.6%        | 65.3% | 31.3%                      |
| 7   | <i>EPHA1</i>  | rs11767557 | G            | A            | Cases   | 3/44/87                       | 2.2%                 | 32.8%        | 64.9% | 30.4%                      |
|     |               |            |              |              | Control | 108/751/1518                  | 4.5%                 | 31.6%        | 63.9% | 32.4%                      |
| 11  | <i>MS4A6A</i> | rs610932   | A            | C            | Cases   | 22/70/41                      | 16.5%                | 52.6%        | 30.8% | 49.0%                      |
|     |               |            |              |              | Control | 463/1179/783                  | 19.1%                | 48.6%        | 32.3% | 49.1%                      |
| 11  | <i>PICALM</i> | rs3851179  | A            | G            | Cases   | 21/70/44                      | 15.6%                | 51.9%        | 32.6% | 48.6%                      |
|     |               |            |              |              | Control | 320/1137/965                  | 13.2%                | 46.9%        | 39.8% | 46.5%                      |

**Table e-1. Genotype frequencies.**

Genetic variants tested, their minor and major alleles, counts and frequencies for minor homozygote (22), heterozygote (12) and major homozygote genotypes are shown for Combined Cases (PCA+Posterior AD) and control groups, separately. a. Expected heterozygote frequencies. None of the SNPs showed significant deviations from Hardy-Weinberg equilibrium, except *ABCA7* locus SNP, where PCA subjects had less heterozygote subjects than expected ( $p=0.005$ ). Chr: chromosome.
