# Supplementary material
Source: PubMed Central journal article supplement (PMC4001196)
Supplement: supp_WNL.0000000000000335_Table_e-2.pdf [file supp_WNL.0000000000000335_Table_e-2.pdf]

**Table e-2. Power calculations**

| Nearest Gene  | SNP        | Minor Allele | Control MAF | AD risk OR | Detectable OR in PCA+Posterior AD | Observed OR in PCA+Posterior AD |
|---------------|------------|--------------|-------------|------------|-----------------------------------|---------------------------------|
| <i>APOE</i>   | rs429358   | C            | 0.123       | 4.36       | 1.63                              | 4.74 (3.37-6.67)                |
| <i>CLU</i>    | rs11136000 | A            | 0.412       | 0.82       | 0.69                              | 0.68 (0.49-0.93)                |
| <i>BIN1</i>   | rs744373   | G            | 0.273       | 1.17       | 1.47                              | 1.42 (1.03-1.96)                |
| <i>APOE</i>   | rs7412     | T            | 0.080       | 0.25       | 0.42                              | 0.46 (0.20-1.07)                |
| <i>ABCA7</i>  | rs3764650  | C            | 0.078       | 1.23       | 1.78                              | 0.98 (0.57-1.70)                |
| <i>PICALM</i> | rs3851179  | A            | 0.367       | 0.80       | 0.68                              | 1.23 (0.90-1.68)                |
| <i>CD2AP</i>  | rs9349407  | C            | 0.267       | 1.11       | 1.48                              | 0.72 (0.50-1.05)                |
| <i>CR1</i>    | rs3818361  | A            | 0.194       | 1.15       | 1.52                              | 1.19 (0.82-1.71)                |
| <i>MS4A6A</i> | rs610932   | A            | 0.434       | 0.87       | 0.69                              | 0.88 (0.64-1.20)                |
| <i>CD33</i>   | rs3865444  | A            | 0.318       | 0.92       | 0.66                              | 0.88 (0.64-1.21)                |
| <i>EPHA1</i>  | rs11767557 | G            | 0.203       | 0.87       | 0.61                              | 0.93 (0.63-1.38)                |

**Table e-2. Power calculations**

Given the minor allele frequencies (MAF) of the tested variants in controls and published OR estimates for AD risk, we estimated the effect sizes that would be detectable in our Combined Case- Control cohort, with 80% power and  $\alpha=0.05$ . Observed OR estimates in our combined cohort is depicted in this table for comparison.
